# Supplementary material for: Efficient Targeted Mutagenesis in Medaka Using Custom-Designed Transcription Activator-Like Effector Nucleases
Source: Oxford University Press journal article supplement (doi:10.1534/genetics.112.147645), 2013-01-04
Supplement: genetics.112.147645-2.pdf [file genetics.112.147645-2.pdf]

**Table S1 Oligonucleotides sequences used in this study**

| Name          | Sequence (5'-3')                           |
|---------------|--------------------------------------------|
| FokI-FW       | GTCAAAGTGAAGTGGAGGAG                       |
| latepA-RV-MCS | GCGCCGCGCCGCTAGCAGATCTAAAAAACCTCCACACCTC   |
| N287FW        | AGATTACGCTGCTCATGGTACCGATCCCATTTCGTCGCGCAG |
| N153FW        | TCATGGTACGCCCCGCGACGGCGTGCT                |
| TAL-R2        | GGCGACGAGGTGGTCGTTGG                       |
| C230RV        | CACTTTGACTAGTTGGGATCCATCCGGGAGGCCGCCCA     |
| C47RV         | TTGGGATCCGATCAATCCGGCGCGTGCGG              |
| M13-FW        | GTAAAACGACGGCCAGT                          |
| M13-RV        | GGAAACAGCTATGACCATG                        |
| DJ1-FW2       | TGTGACTGTAGCGGGTCTGA                       |
| DJ1-RV1       | GTGTGAACAACGCTGCATT                        |
| DJ1-off1-FW   | GCATGCCAGAATGTGCTT                         |
| DJ1-off1-RV   | GTTGCAAAGCAGTTGCAGAA                       |
